# Supplementary material
Source: ML conference proceedings conference paper supplement (https://openreview.net/forum?id=evWx_rWWJuG)
Supplement: supplementary_material [file attachment]

---

# Supplementary Materials for “Fully Sparse 3D Object Detection”

---

Anonymous Author(s)

Affiliation

Address

email

## 1 A Qualitative Analysis of Center Feature Missing

### 2 A.1 Center Heatmap

3 We first visualize the learned centerness heatmap of  $SST_{center}$  in Fig. 1. For vehicle with regular  
4 sizes, there are usually sharp and accurate heatmap peaks. However, the score distribution in large  
5 vehicle is usually smooth and ambiguous, or even broken (multiple peaks in an object).

### 6 A.2 Comparison Instance Point Grouping with Center Assignment

7 We also make a qualitative comparison between our strategy and the center assignment ( $SST_{center}$ )  
8 in Fig. 2. We list some analysis as follows.

- 9 1. FSD does not heavily rely on the quality of center voting, because FSD only use center  
10 voting as a step for instance point grouping (i.e., instance segmentation). Even the center  
11 positions are not accurate, we can still segment the instances.
- 12 2. For the large vehicles, the voted centers could also exhibit a non-sharp distribution (e.g., the  
13 first row in Fig. 2). However, FSD could group them via connected components labeling to  
14 obtain the instance segmentation.
- 15 3. For center assignment, the predicted box centers are around the heatmap peaks. That said, if  
16 the peaks are ambiguous or even broken due to center feature missing, the predicted boxes  
17 would be of low quality.

### 18 A.3 Prediction Visualization

19 Finally, we show the visualization of predictions in Fig. 3 to further illustrate that our method avoids  
20 the adverse effects of center feature missing (CFM). Due to CFM, the predictions from center features  
21 in large vehicles usually have less confident scores. So these less confident predictions are very likely  
22 to be suppressed by some smaller inaccurate bounding boxes with higher scores in NMS.

## 23 B Implementation Details

24 We provide the detailed configuration file in our attached `fsd_config.py` file, which is the config  
25 we used to implement FSD in MMDetection3D codebase [1]. For a better understanding, we leave  
26 detailed code comments in the attached file. Here we select and list some common hyper-parameters.  
27 If readers are interested in more details, please refer to the attached `fsd_config.py` file. The full  
28 code will be soon released after refactoring.

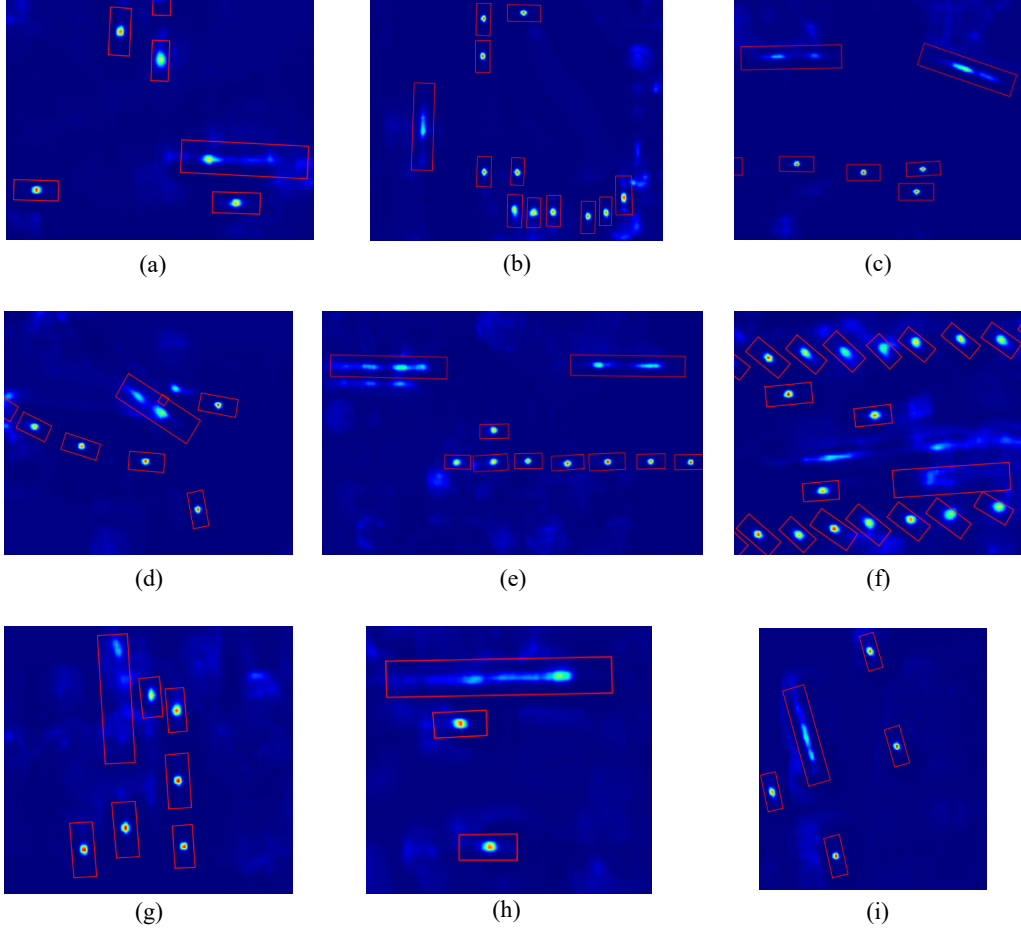

Figure 1: Center heatmap visualization of  $SST_{center}$ . Red boxes are ground-truth bounding boxes. For vehicle with regular sizes, there are sharp and accurate heatmap peaks. However, the score distribution in large vehicle is usually smooth and ambiguous, or even broken. For example, in (a) and (h), the position of the center peak in the large vehicle is inaccurate (closer to vehicle heads). In (d) and (e), there are two or more ambiguous center peaks in the large vehicles.

29 **Hardware** For experiments on Waymo Open Dataset, we use 8 2080Ti GPUs. For experiments on  
 30 Argoverse 2 (AV2), we use 8 3090 GPUs because the long-range experiments of CenterPoint on AV2  
 31 require GPU memory larger than 11GB.

32 **Optimization** Following SST [2], the batch size we adopt is 1 for each GPU and the synchronized-  
 33 BN is enabled. We use AdamW as the optimizer with 0.05 weight decay. The maximum learning rate  
 34 is  $1e-3$  scheduled by cosine schedule strategy.

35 **Loss functions** For the semantic classification in Instance Point Grouping, we apply the Focal Loss  
 36 to each point, which we denoted as  $L_{sem}$  in the main paper.  $L_{sem}$  is normalized by the number of all  
 37 points. For voting loss ( $L_{vote}$ ) in Instance Point Grouping, it is normalized by the number of points  
 38 inside the ground-truth bounding boxes. For the classification loss in SIR/SIR2 ( $L_{cls}$  and  $L_{iou}$ ), they  
 39 are normalized by the number of all groups in a batch.  $L_{reg}$  and  $L_{res}$  are normalized by the number  
 40 of *positive* groups. Moreover, the loss weight of  $L_{cls}$  is 2.0. The loss weights of others are all 1.0.

41 **Instance Point Grouping** In the Instance Point Grouping, the foreground score thresholds for  
 42 vehicle/pedestrian/cyclist are 0.5/0.25/0.25, respectively. Only points with scores higher than the  
 43 thresholds contribute to the voting. The distance thresholds used in Connected Components Labeling  
 44 (CCL) are 0.6m/0.1m/0.2m for vehicle/pedestrian/cyclist, respectively. In our implementation, we

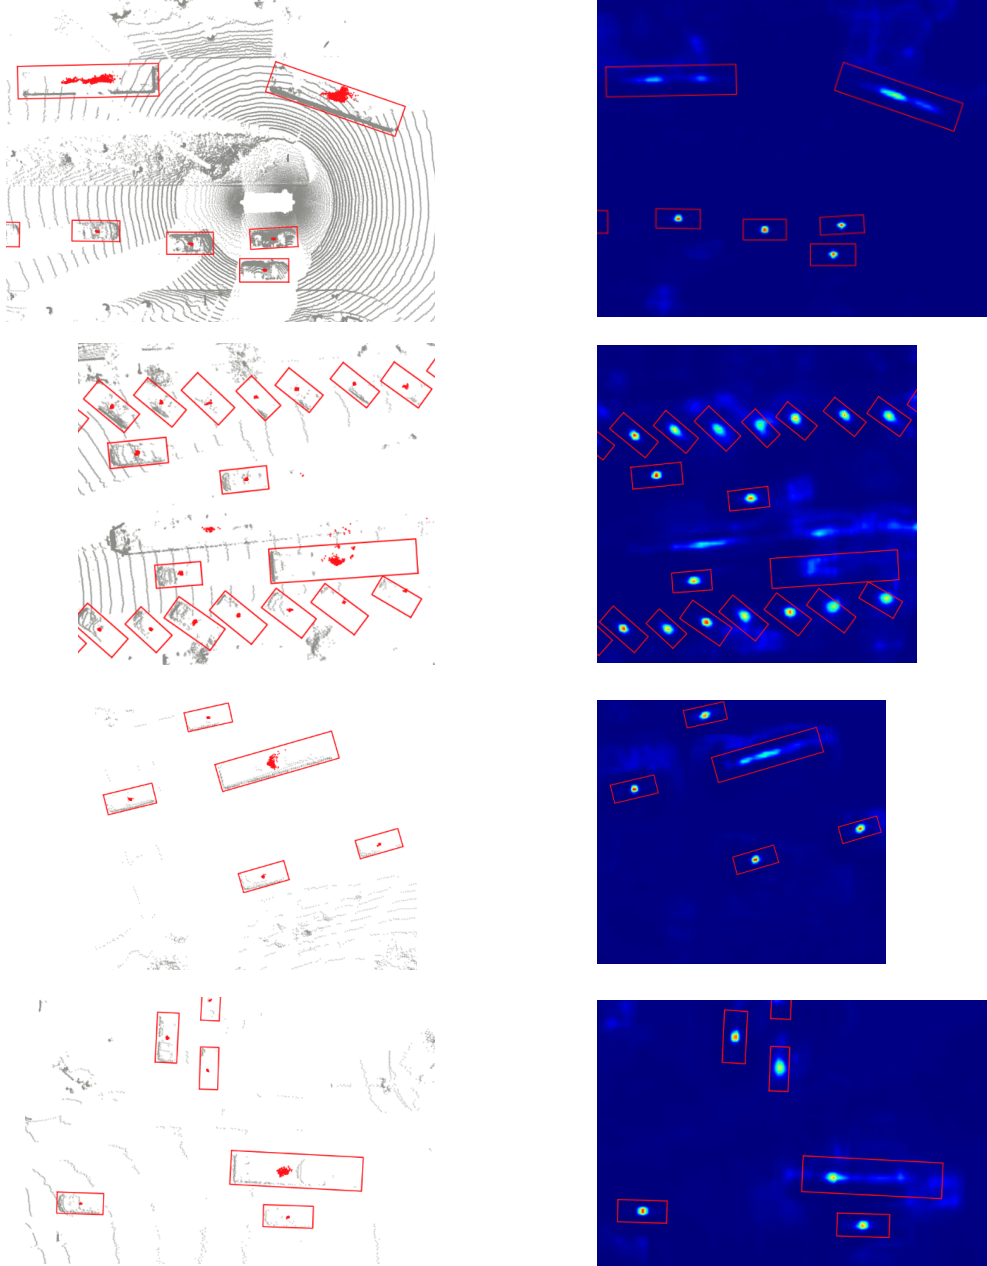

Figure 2: Qualitative comparison between Instance Point Grouping in FSD and center heatmap in  $SST_{center}$ . **The left column** shows the results of Instance Point Grouping, and **the right column** show the learned center heatmaps. **Red** points are the voted centers. **Red** boxes are ground truth bounding boxes. We provide analysis in Sec. A.2.

45 use voxelization to accelerate the CCL. Specifically, we first voxelize the predicted centers and then  
 46 apply CCL on the voxel centers. Thus, each voxel has a group ID after CCL. All the points inside a  
 47 voxel use the group ID of the voxel. In practice, the voxelization size is  $0.2m \times 0.2m \times 6.0m$ , which  
 48 is pillar voxelization. Note that the predicted centers are usually closed to each other, so there are  
 49 only hundreds of pillars after voxelization, making the CCL highly efficient.

50 **Network Architecture** For voxelization, we follow SST adopting the voxel size of  $0.32m \times$   
 51  $0.32m \times 6m$ , which is the pillar representation. The numbers of hidden channels in SIR/SIR2 are all

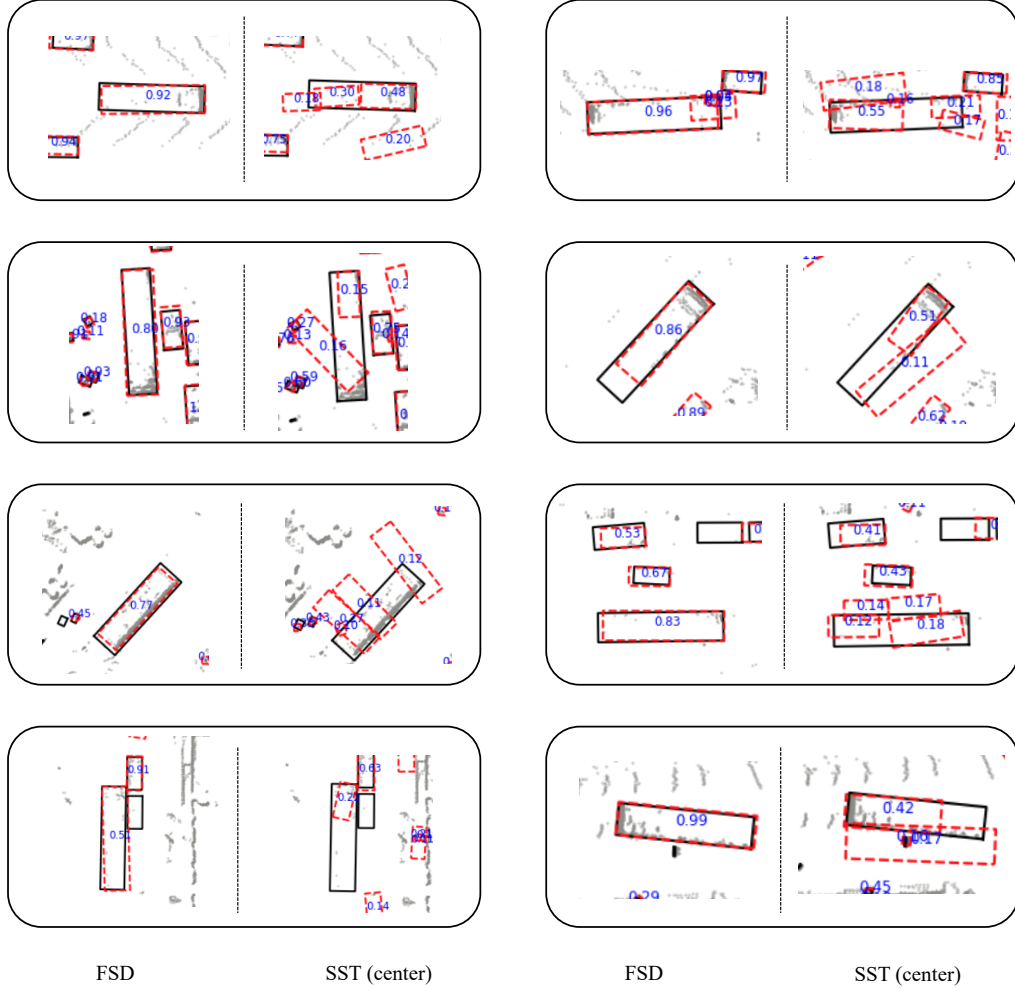

Figure 3: Qualitative comparison between the predictions from FSD and  $SST_{center}$ . In each subfigure, the left patch shows the predictions of FSD, and the right one shows the predictions of SST. We label the confident scores of predictions with blue numbers. Red boxes are the predictions and black boxes are ground-truth boxes. Due to center feature missing of SST, the predictions from center features in large vehicles usually have less confident scores. So these less confident predictions are very likely to be suppressed by some smaller inaccurate bounding boxes with higher scores in NMS. Best viewed in color and with zooming in.

128. GeLU is adopted as the activation function, and LayerNorm is adopted as the normalization  
 129 function.

**Group Correction** As we discussed in the main paper, the prerequisite of dynamic broad-  
 cast/pooling is that groups do not overlap with each other. Since SIR predicts a single box proposal  
 for a group, the proposals do not overlap with each other usually. However, in a few cases, there are a  
 small number of points falling into multiple proposals. In practice, we simply copy these points for  
 each group. In this way, each point has a unique group ID, and then dynamic broadcast/pooling can  
 be adopted to realize SIR2.

**Inference** The prediction with a score higher than 0.1 will be sent to Non-Maximum Suppression  
 (NMS). The IoU threshold in NMS is 0.25 for all classes.

## 62 C A Rare Failure Case

Fig. 4 show a very rare failure case and our analysis.

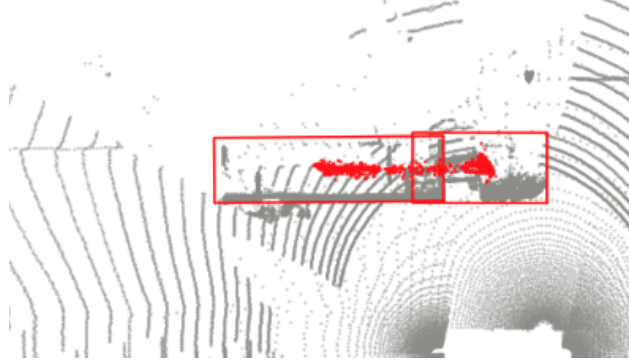

Figure 4: A failure case of point grouping due to improper overlapped annotation. Red points are the voted centers. The red ground-truth bounding boxes of the truck box and truck head have an improper overlap. The simple CCL is likely to recognize them as a single instance. Fortunately, this problem could be avoid if we have more accurate annotations or adopt other grouping methods (e.g., ball query in SSG).

63

## 64 D Details of Argoverse 2

65 Argoverse 2 (AV2) dataset contains 30 classes, where 26 classes are officially defined as valid classes.  
 66 Following the CenterPoint model provided by the authors of AV2, we divide the 26 classes into 6  
 67 groups. In the attached `argoverse_data_config.py` file, we show the specific grouping strategy  
 68 and related hyper-parameters.

## 69 E Sparse Convolution Based Voxel Encoder

70 In the main paper, we report the results of  $FSD_{spconv}$ , where we adopt sparse convolution based  
 71 UNet [5] (SC-UNet) as the sparse voxel encoder. Specifically, we utilize the implementation of  
 72 SC-UNet in MMDetection3D [1] ([https://github.com/open-mmlab/mmdetection3d/blob/master/mmdet3d/models/middle\\_encoders/sparse\\_unet.py](https://github.com/open-mmlab/mmdetection3d/blob/master/mmdet3d/models/middle_encoders/sparse_unet.py)). The input voxel size of SC-  
 74 UNet is  $0.2m \times 0.2m \times 0.2m$ . We also provide a `fsd_spconv_config.py` in our attached files,  
 75 where all the architecture parameters needed in SC-UNet.

## 76 F Results on Test Server

77 Table 1 shows the results on test split. We also list several top-performing detectors. For a fair  
 78 comparison, all the detectors we list use single frame point cloud, do not use ensemble strategies, and  
 do not adopt test-time augmentation.

Table 1: Performances on the Waymo Open Dataset test split. We report the top-performing non-ensemble methods taking single frame point clouds and single modality as input.

| Methods               | mAP/mAPH<br>L2 | Vehicle 3D AP/APH |           | Pedestrian 3D AP/APH |           | Cyclist 3D AP/APH |           |
|-----------------------|----------------|-------------------|-----------|----------------------|-----------|-------------------|-----------|
|                       |                | L1                | L2        | L1                   | L2        | L1                | L2        |
| CenterPoint-Voxel [9] | -/69.0         | -/-               | -/71.9    | -/-                  | -/67.0    | -/-               | -/68.2    |
| PV-RCNN [4]           | 71.3/68.8      | 80.6/80.1         | 72.8/72.4 | 78.2/72.0            | 71.8/66.0 | 71.8/70.4         | 69.1/67.8 |
| AFDetV2-lite [3]      | 72.2/70.0      | 80.5/80.0         | 73.0/72.6 | 79.8/74.3            | 73.7/68.6 | 72.4/71.2         | 69.8/69.7 |
| PV-RCNN++ [6]         | 72.4/70.2      | 81.6/81.2         | 73.9/73.5 | 80.4/75.0            | 74.1/69.0 | 71.9/70.8         | 69.3/68.2 |
| FSD (ours)            | 73.0/71.0      | 81.5/81.2         | 73.0/72.7 | 81.7/76.8            | 74.6/70.1 | 74.2/73.0         | 71.4/70.2 |

79

## 80 G Issues Related to Checklist

81 **Codebase** We use MMDetection3D [1] for all of our experiments. MMDetection3D offers solid  
82 implementation of a wide variety of 3D detection algorithms. MMDetection3D is licensed under  
83 Apache License, Version 2.0.

84 **Dataset** We use Waymo Open Dataset [7] and Argoverse 2 [8] dataset as the benchmark for  
85 our experiments. They are all public benchmark. See <https://waymo.com/open/terms/> and  
86 <https://www.argoverse.org/about.html#terms-of-use> for the detailed terms of use.

87 **Error Bar** WOD and AV2 are all large-scale dataset, so the performances are very robust and the  
88 run-to-run error is less than 0.2 mAP.

## 89 References

- 90 [1] MMDetection3D Contributors. MMDetection3D: OpenMMLab Next-generation Platform for General 3D  
91 Object Detection. <https://github.com/open-mmlab/mmdetection3d>, 2020.
- 92 [2] Lue Fan, Ziqi Pang, Tianyuan Zhang, Yu-Xiong Wang, Hang Zhao, Feng Wang, Naiyan Wang, and  
93 Zhaoxiang Zhang. Embracing Single Stride 3D Object Detector with Sparse Transformer. In *CVPR*, 2022.
- 94 [3] Yihan Hu, Zhuangzhuang Ding, Runzhou Ge, Wenxin Shao, Li Huang, Kun Li, and Qiang Liu. AFDetV2:  
95 Rethinking the Necessity of the Second Stage for Object Detection from Point Clouds. *arXiv preprint*  
96 *arXiv:2112.09205*, 2021.
- 97 [4] Shaoshuai Shi, Chaoxu Guo, Li Jiang, Zhe Wang, Jianping Shi, Xiaogang Wang, and Hongsheng Li.  
98 PV-RCNN: Point-Voxel Feature Set Abstraction for 3D Object Detection. In *CVPR*, 2020.
- 99 [5] Shaoshuai Shi, Zhe Wang, Jianping Shi, Xiaogang Wang, and Hongsheng Li. From Points to Parts: 3D  
100 Object Detection from Point Cloud with Part-aware and Part-aggregation Network. *IEEE Transactions on*  
101 *Pattern Analysis and Machine Intelligence*, 2020.
- 102 [6] Shaoshuai Shi, Li Jiang, Jiajun Deng, Zhe Wang, Chaoxu Guo, Jianping Shi, Xiaogang Wang, and Hong-  
103 sheng Li. PV-RCNN++: Point-Voxel Feature Set Abstraction With Local Vector Representation for 3D  
104 Object Detection. *arXiv preprint arXiv:2102.00463*, 2021.
- 105 [7] Pei Sun, Henrik Kretschmar, Xerxes Dotiwalla, Aurelien Chouard, Vijaysai Patnaik, Paul Tsui, James Guo,  
106 Yin Zhou, Yuning Chai, Benjamin Caine, et al. Scalability in Perception for Autonomous Driving: Waymo  
107 Open Dataset. In *CVPR*, 2020.
- 108 [8] Benjamin Wilson, William Qi, Tanmay Agarwal, John Lambert, Jagjeet Singh, Siddhesh Khandelwal,  
109 Bowen Pan, Ratnesh Kumar, Andrew Hartnett, Jhony Kaesemodel Pontes, Deva Ramanan, Peter Carr,  
110 and James Hays. Argoverse 2: Next Generation Datasets for Self-Driving Perception and Forecasting. In  
111 *NeurIPS Datasets and Benchmarks 2021*, 2021.
- 112 [9] Tianwei Yin, Xingyi Zhou, and Philipp Krähenbühl. Center-based 3D Object Detection and Tracking. *arXiv*  
113 *preprint arXiv:2006.11275*, 2020.
